# Supplementary material
Source: PubMed Central journal article supplement (PMC2790330)
Supplement: NIHMS156652-supplement-1.pdf [file NIHMS156652-supplement-1.pdf]

## **Reducing endoplasmic reticulum stress through a macrophage lipid chaperone alleviates atherosclerosis**

Ebru Erbay<sup>1</sup>, Vladimir R. Babaev<sup>2</sup>, Jared R. Mayers<sup>1</sup>, Liza Makowski<sup>3</sup>, Khanichi N. Charles<sup>1</sup>, Melinda Snitow<sup>1</sup>, Sergio Fazio<sup>2</sup>, Michelle M. Wiest<sup>4</sup>, Steven M. Watkins<sup>4</sup>, MacRae F. Linton<sup>2</sup> and Gökhan S. Hotamisligil<sup>1</sup>

### **Supplemental Materials and Methods:**

**Reagents and plasmids:** Western diet #TD88137 was obtained from Harlan Teklad, Madison, Wisconsin. Antibodies against total eIF2- $\alpha$ , phospho-(Thr980) PERK, activated caspase 3, cleaved PARP, and PDI were from Cell Signaling, phospho-(serine 52) eIF2- $\alpha$  and CD3 from Invitrogen, CHOP, tubulin, ATF-3 and LXR- $\alpha$  from Santa Cruz, MOMA-2 from Accurate Chemical & Scientific Corp., Westbury, NY, CD11c from BD Biosciences,  $\alpha$ -SMA from Sigma and LXR- $\beta$  antibody from Thermo Scientific. The anti-FABP antibody was generated in our laboratory. Horseradish peroxidase (HRP)-conjugated goat anti-rabbit IgG and goat anti-mouse IgG were from Ambion. Biotinylated secondary antibodies to rat or rabbit IgG were from BD Pharmingen. Tissue culture materials were purchased from VWR and media were obtained from Invitrogen. Fetal bovine serum (FBS) was obtained from Hyclone Laboratories and was heat inactivated for 30 minutes at 65<sup>0</sup>C. The ACAT inhibitor was a generous gift of Alan Edgar (Fournier, France). AcLDL was obtained from Biomedical Technologies. Thapsigargin, tunicamycin, T0901317 and PBA were from Calbiochem, 25 hydroxy cholesterol and cycloheximide from Sigma and the aP2 inhibitor (BMS309403) was obtained from Bristol-Myers Squibb Pharmaceutical Research Institute. The caspase-Glo 3/7 and dual luciferase assays were obtained from Promega. The TK-LXRE-X3luc reporter was a generous gift of David

Mangelsdorf (UT Southwestern). Glucose oxidase kit was from Sigma. Mouse insulin ELISA kit from Alpco Diagnostics.

**Primers and siRNA:** Primer sequences for *aP2*, *Ddit3*, *Fasn*, *SCD-1*, *sXBP-1*, *Abca1*, *Abcg1*, and *CD51* were previously published<sup>29,37,39</sup>. All primers used for qRT-PCR were synthesized at Qiagen and for siRNA at Ambion. The pGEX-aP2-LM (R126L, Y128F) plasmid was a generous gift of David Bernlohr, was recloned into a pCDNA3 vector<sup>30</sup>. The siRNA sequence for *SCD-1* was sense: 5'GCCUUU AAUCAACCCAAG-ATT-3' and antisense: 5'-UCUUGGGUUGAUUAAAGGCTT-3' and for *Nr1h3* was sense: 5'-GGACUUCAGUUACAACCGGTT-3' and antisense: 5'-CCGGUUGUAAACUGAAGUCCTT-3'.

**Fatty acid uptake assay:** Macrophages were incubated with <sup>3</sup>H labeled palmitic acid at a final concentration of 100µM palmitic acid at 37°C for 1 hour. The uptake was terminated by the addition of ice-cold stop solution containing 0.1% BSA and 200µM phloretin in Krebs-Ringer phosphate solution. The cells were then washed three times with Krebs-Ringer phosphate buffer to remove unincorporated fatty acids. Cells were lysed in Krebs-Ringer buffer with 0.3% Triton-X and, lysate was transferred into liquid scintillation tubes and counted with a liquid scintillation counter. From the lysates, total protein concentrations were measured using Biorad assay and fatty acid uptake data was represented as the ratio of total cpm counts to total protein concentration.

**SCD activity assay:** SCD activity was determined from the production of <sup>3</sup>H<sub>2</sub>O using [9, 10-<sup>3</sup>H]-stearoyl-CoA as substrate<sup>50</sup>. Macrophages were lysed and microsomal fractions (105,000xg) were isolated by sequential centrifugations. Reactions were performed at 37°C for 30 min with 100 µg/mL protein homogenate, 10 µM (2 µCi/mL) of [9, 10-<sup>3</sup>H]-stearoyl-CoA and 30 µM NADH in 100 µL of 10 mM potassium phosphate buffer (pH 7.4). After the reaction, 100 µL of 10 mg mL<sup>-1</sup> fatty acid-free BSA and 200 µL of 10% trichloroacetic acid were

added. After centrifugation (5000 g for 10 min) radioactive counts in the supernatant were measured by a scintillation counter. The enzyme activity was expressed as  $\text{nmol min}^{-1} \text{mg}^{-1}$  protein.

a.

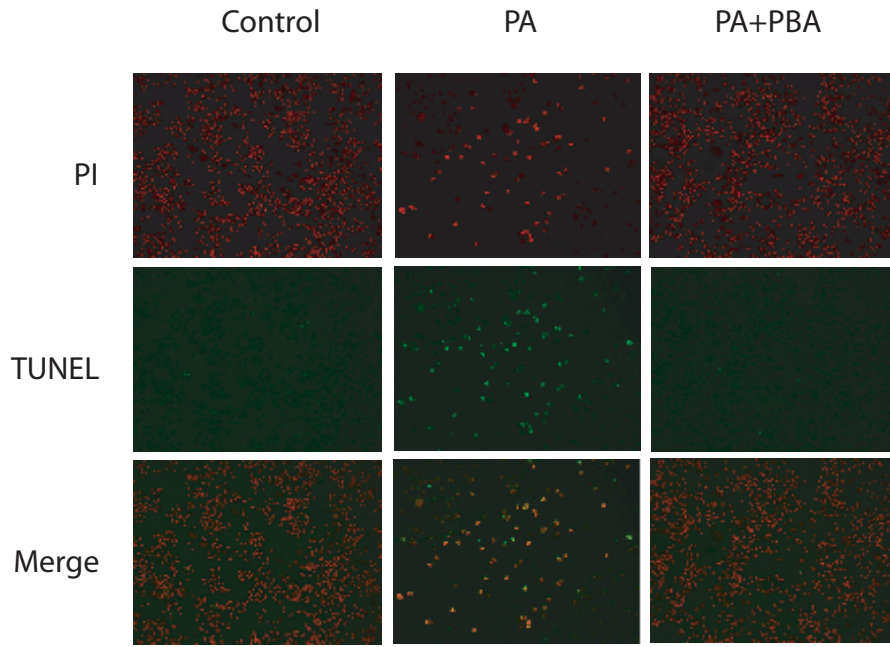

b.

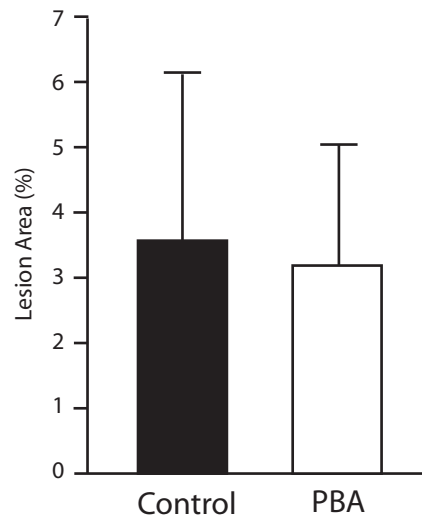

c.

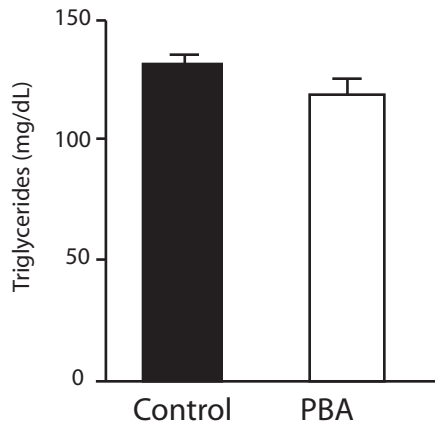

d.

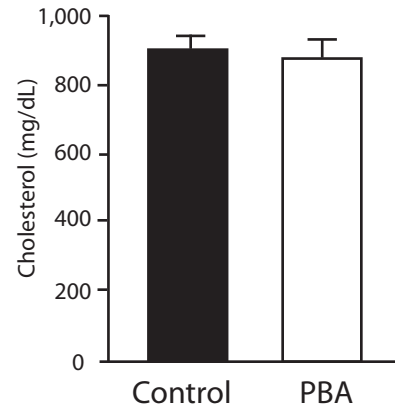

e.

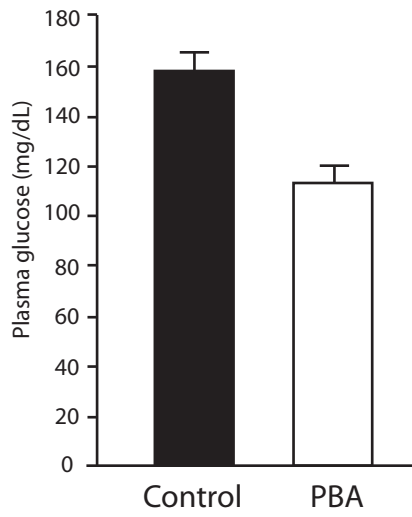

f.

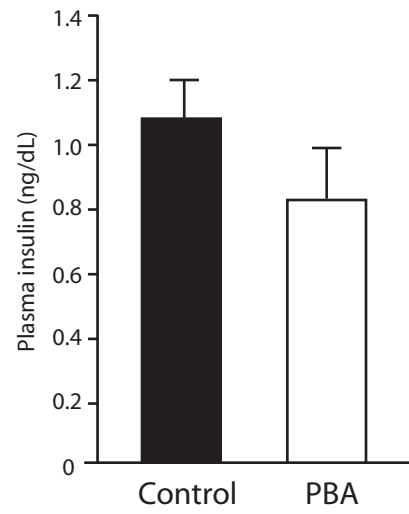

g.

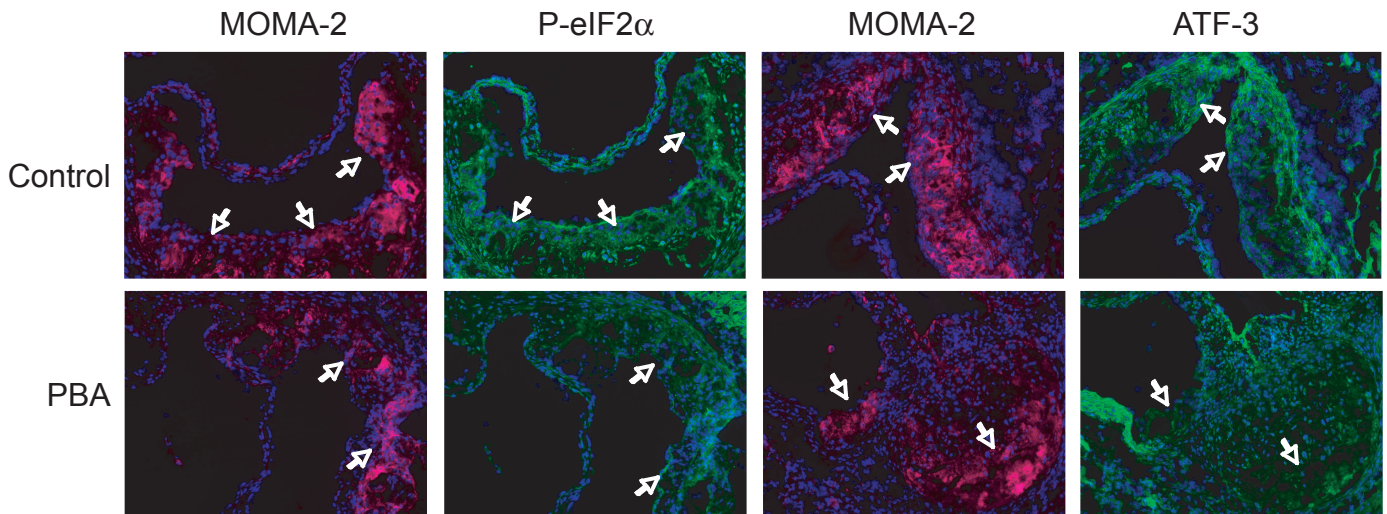

a.

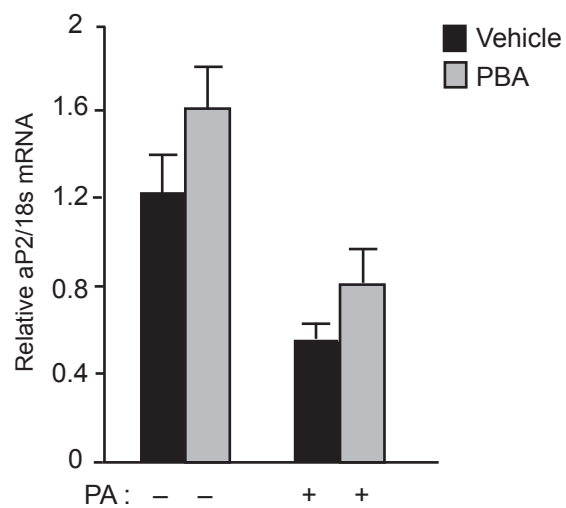

b.

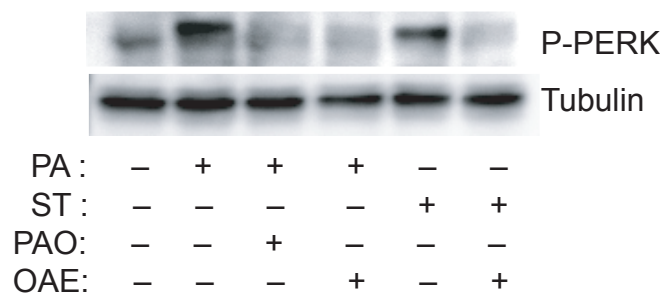

c.

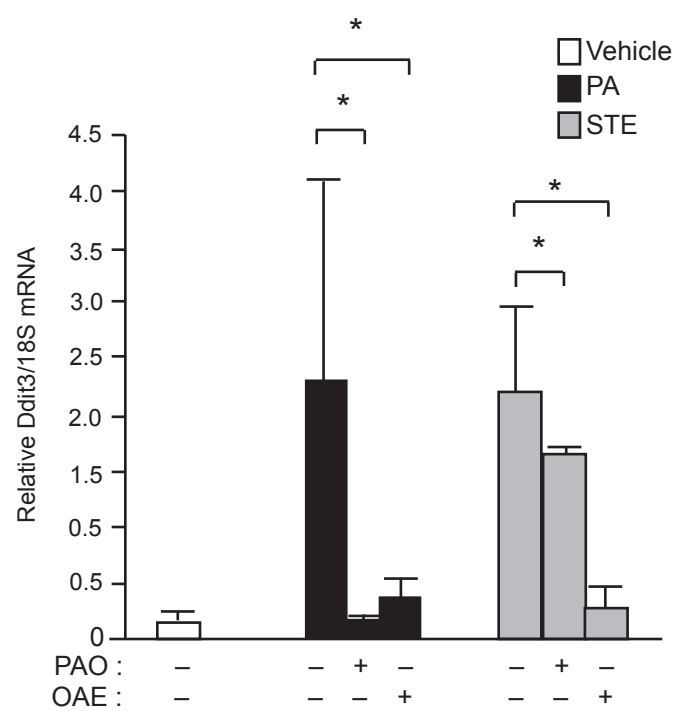

d.

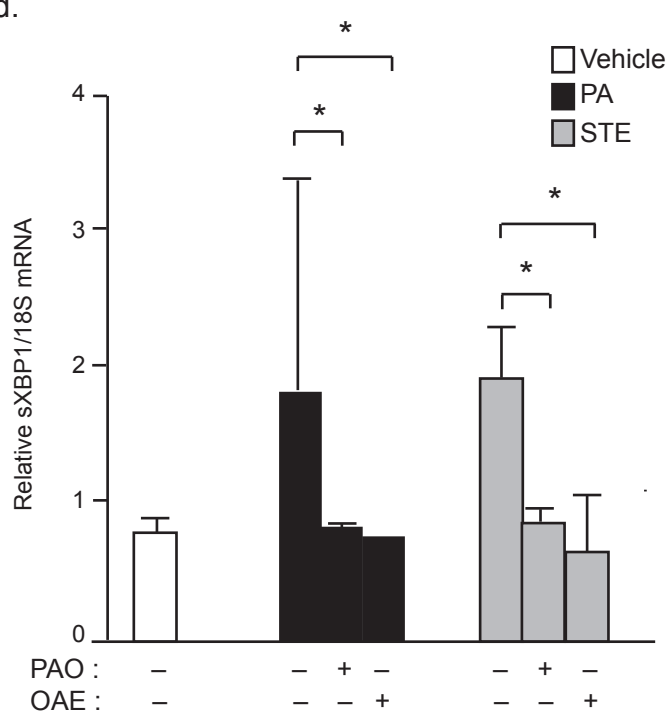

e.

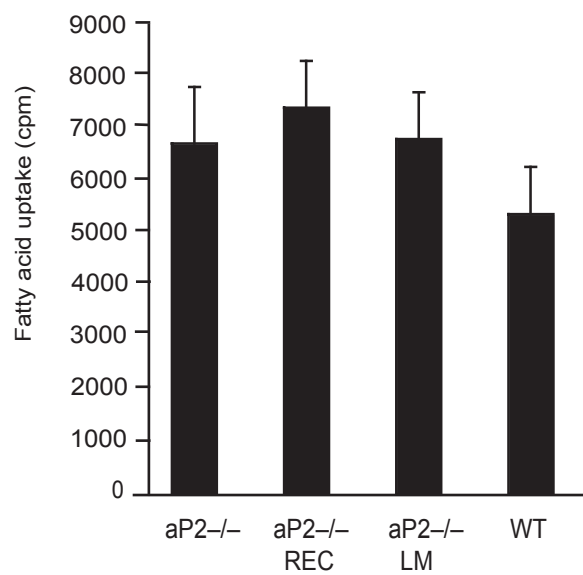

f.

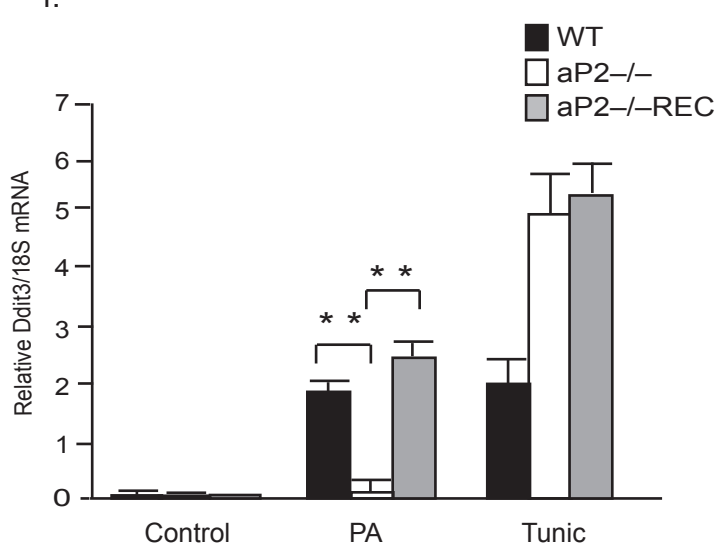

g.

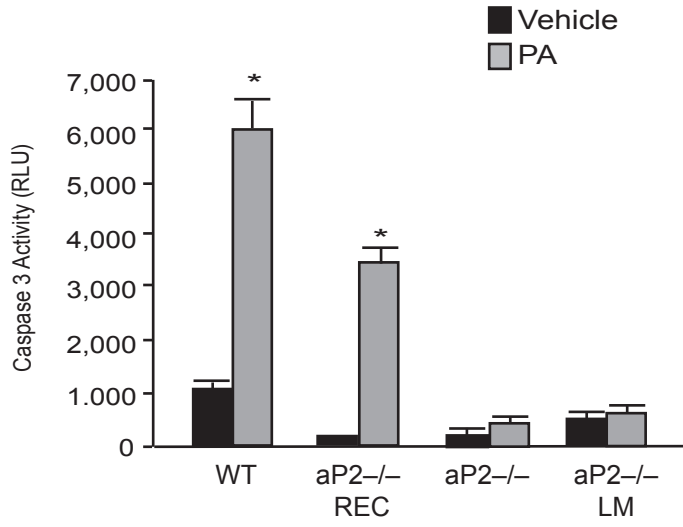

h.

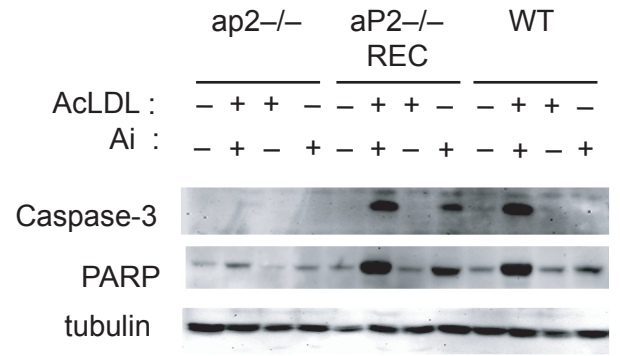

a.

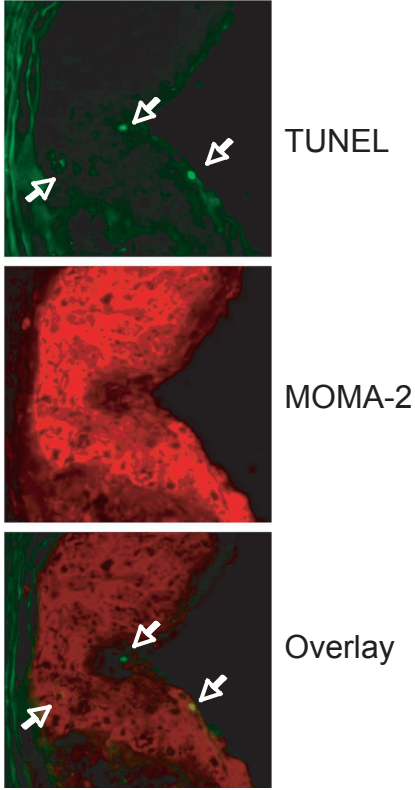

b.

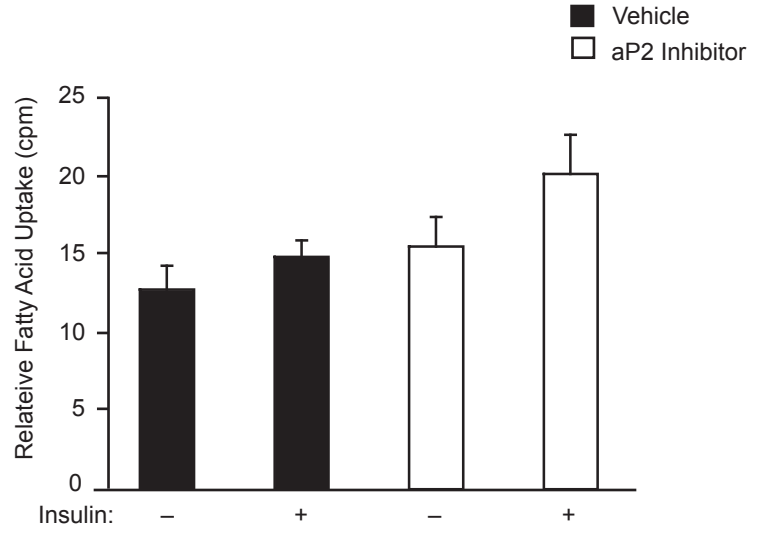



a.

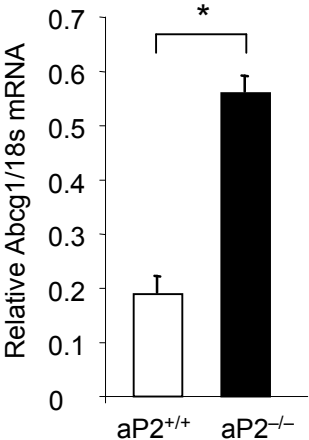

b.

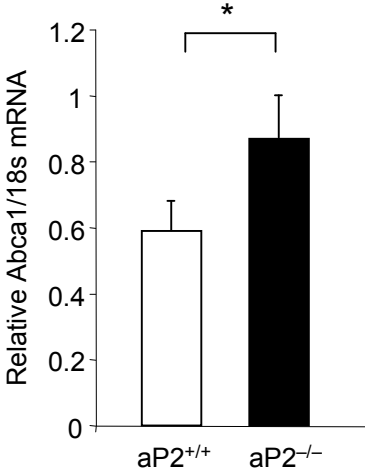

c.

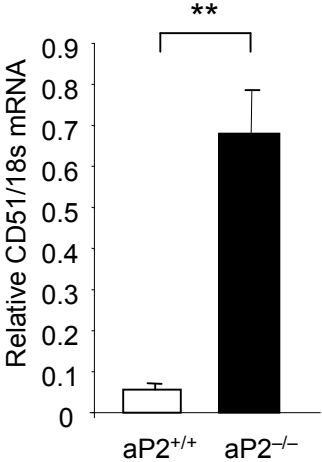

d.

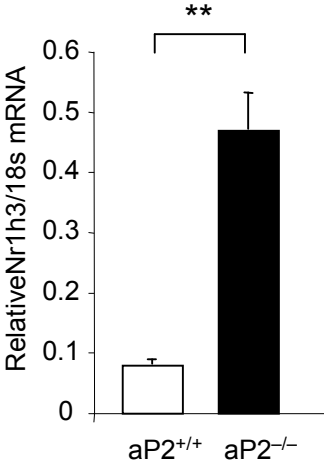

e.

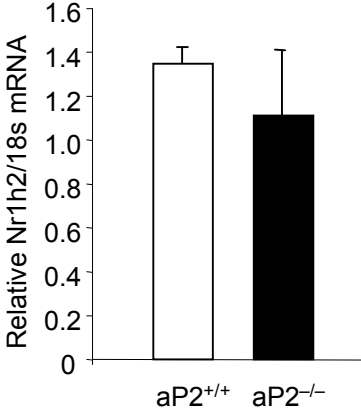

a.

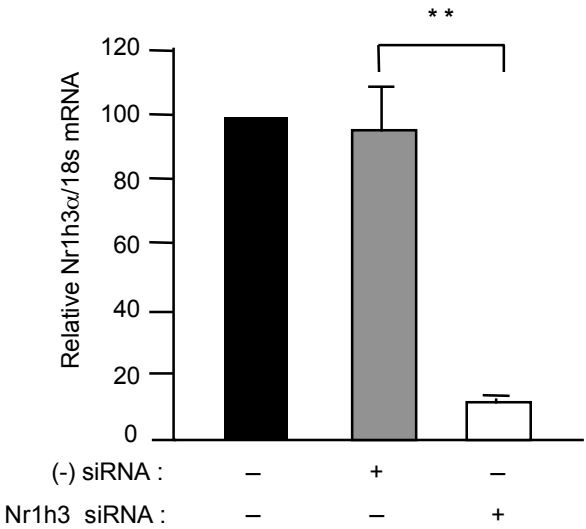

b.

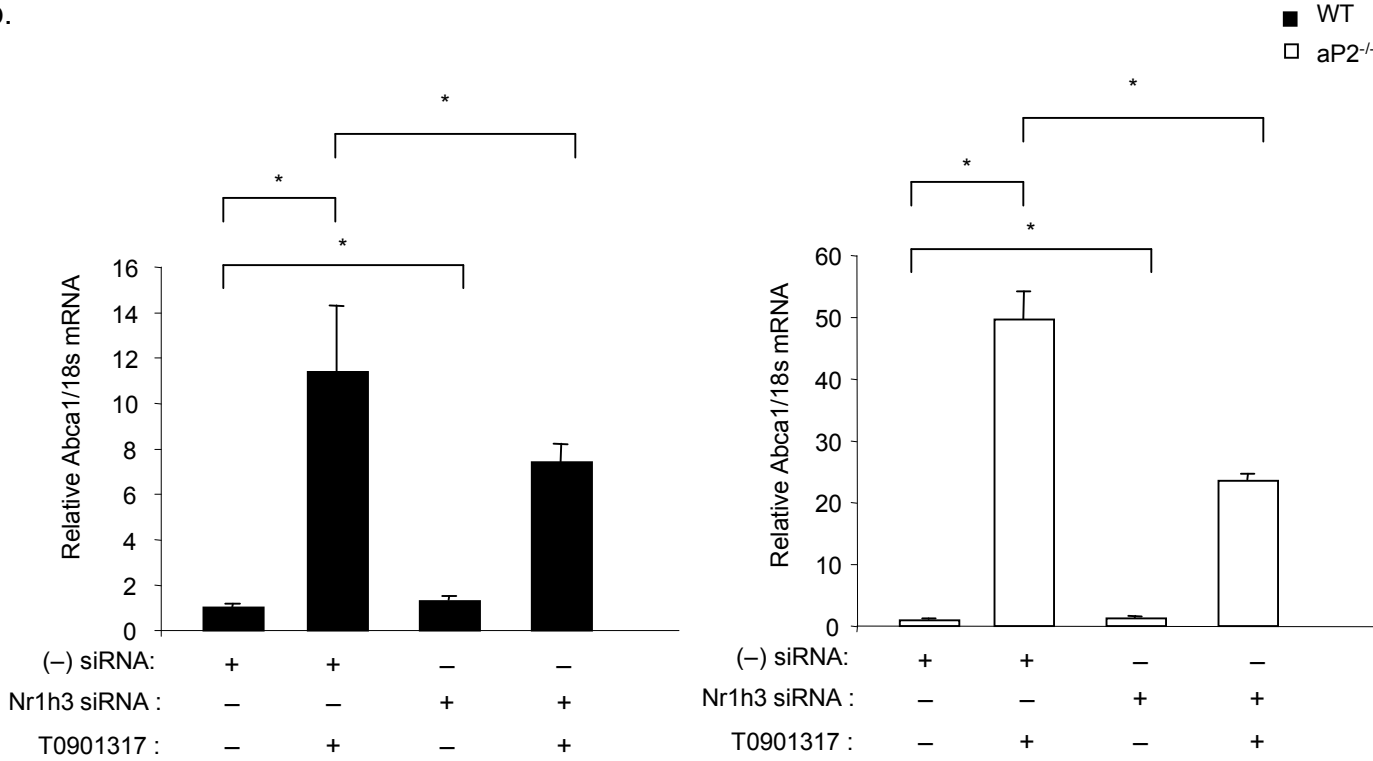

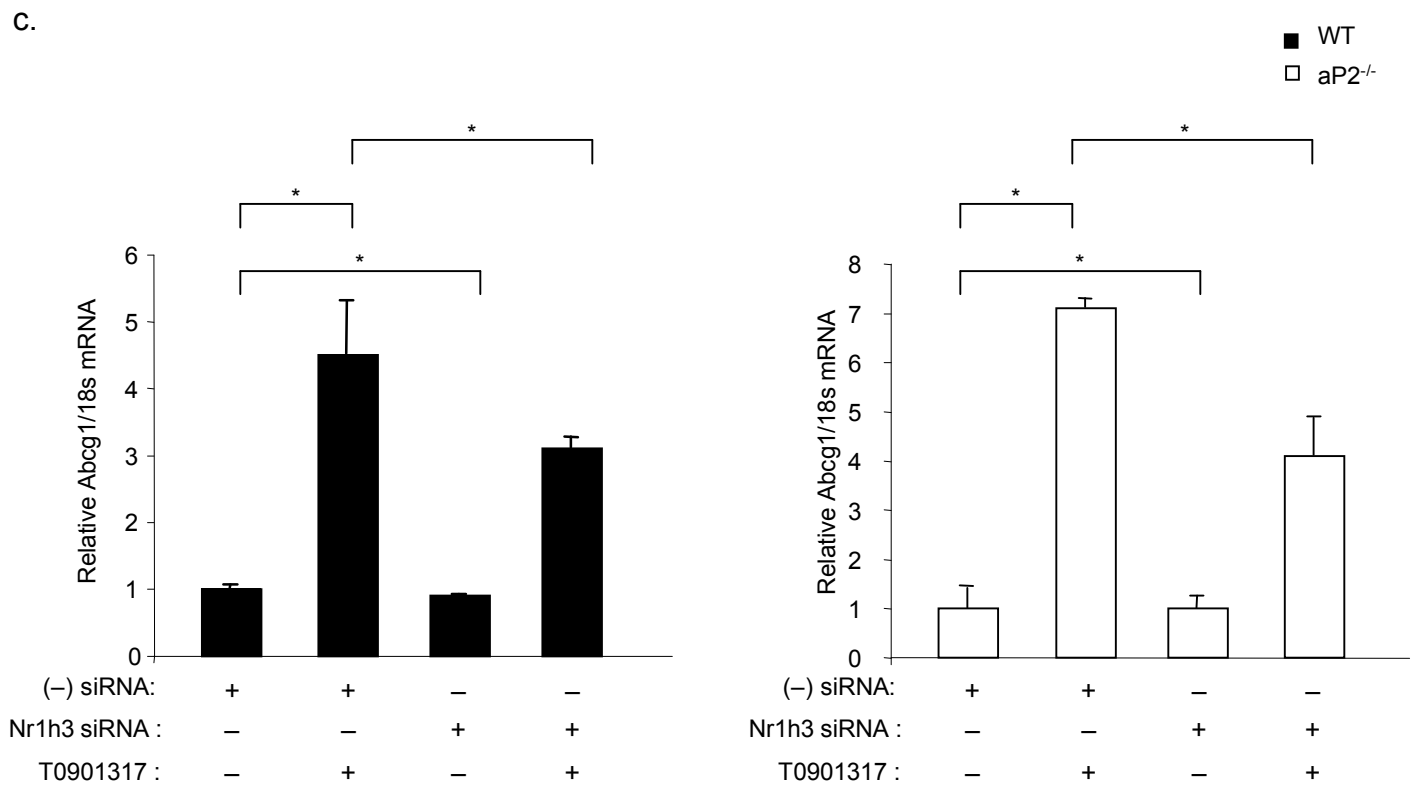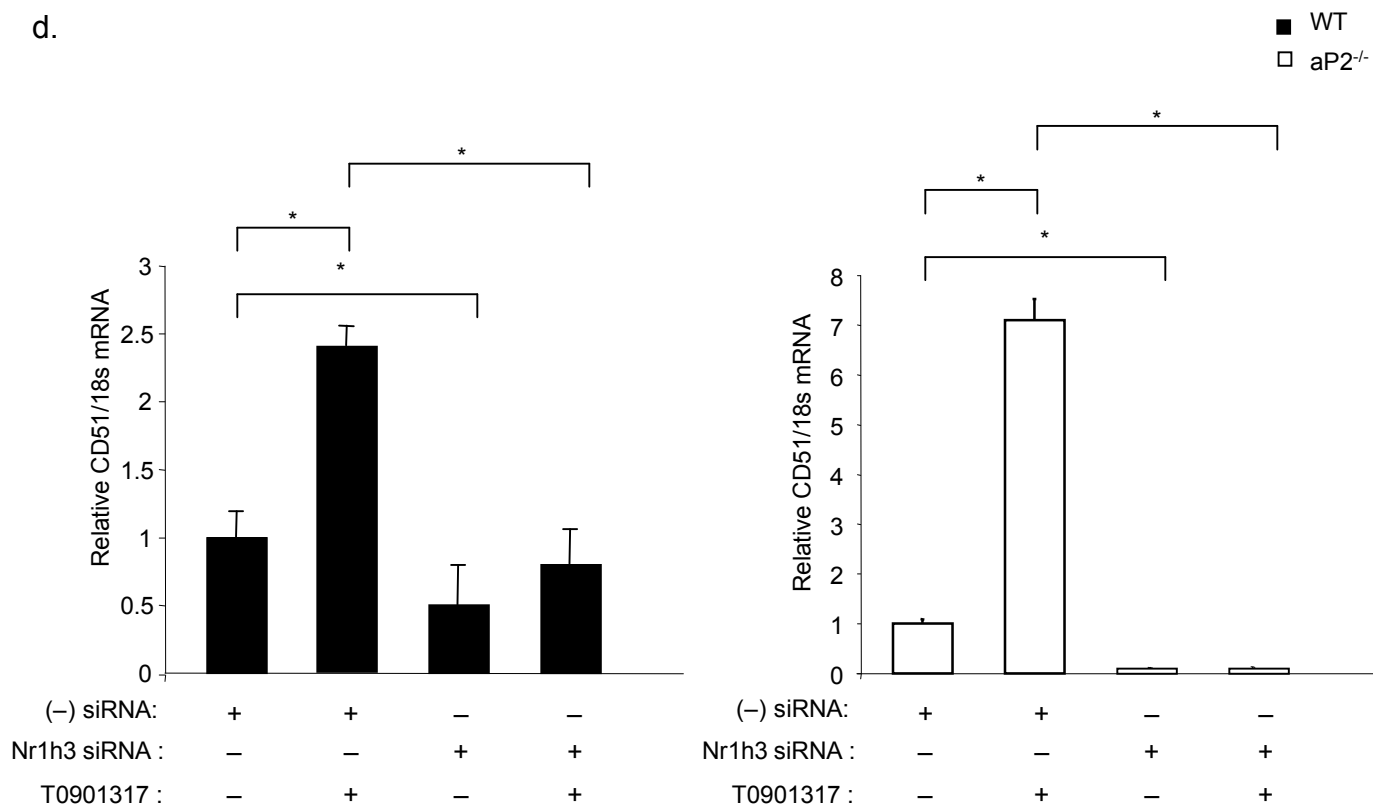

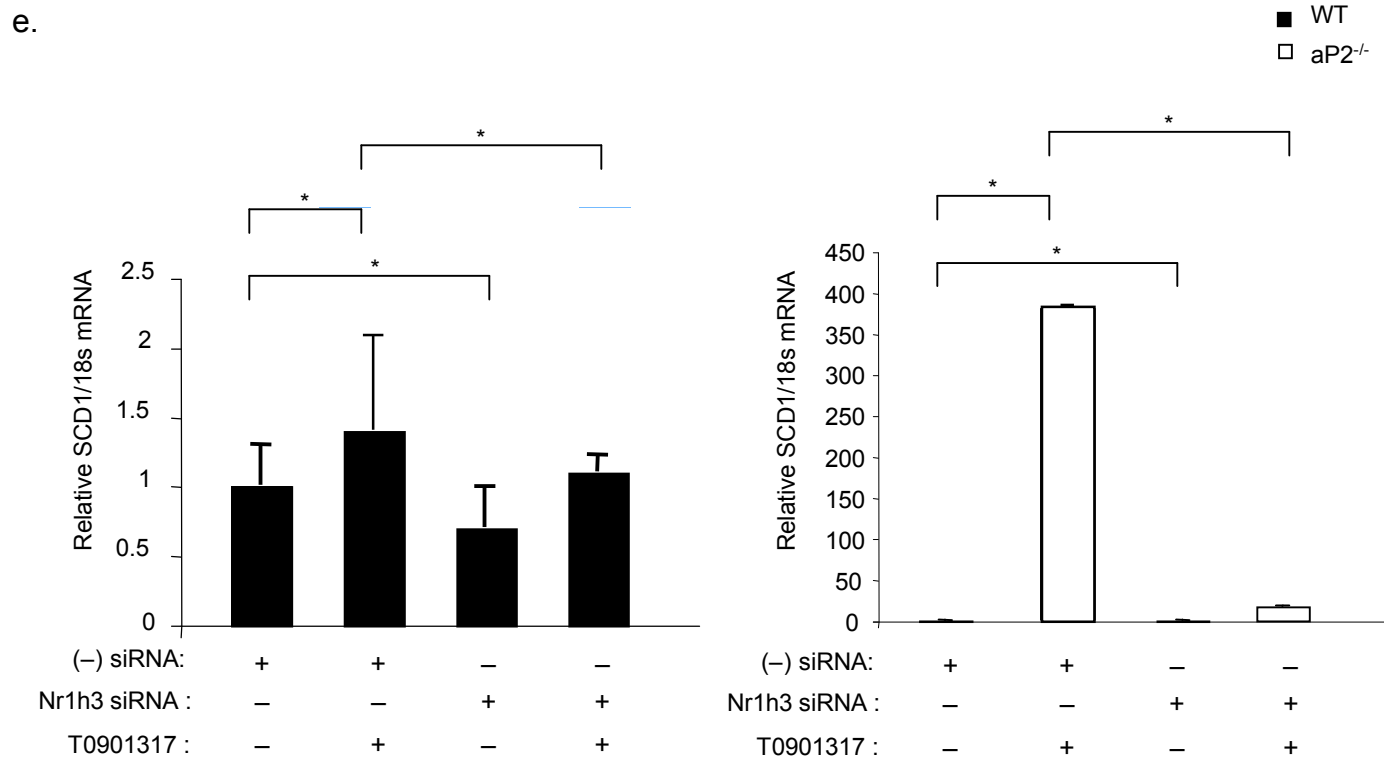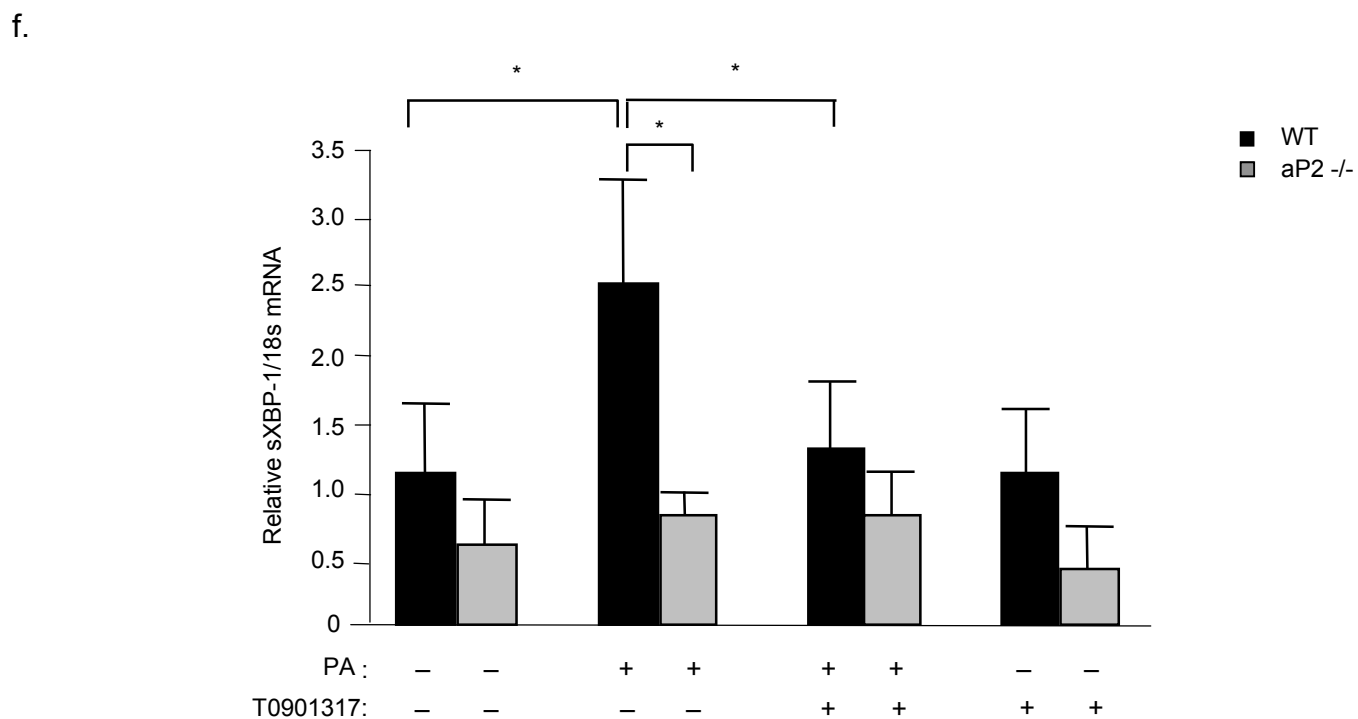

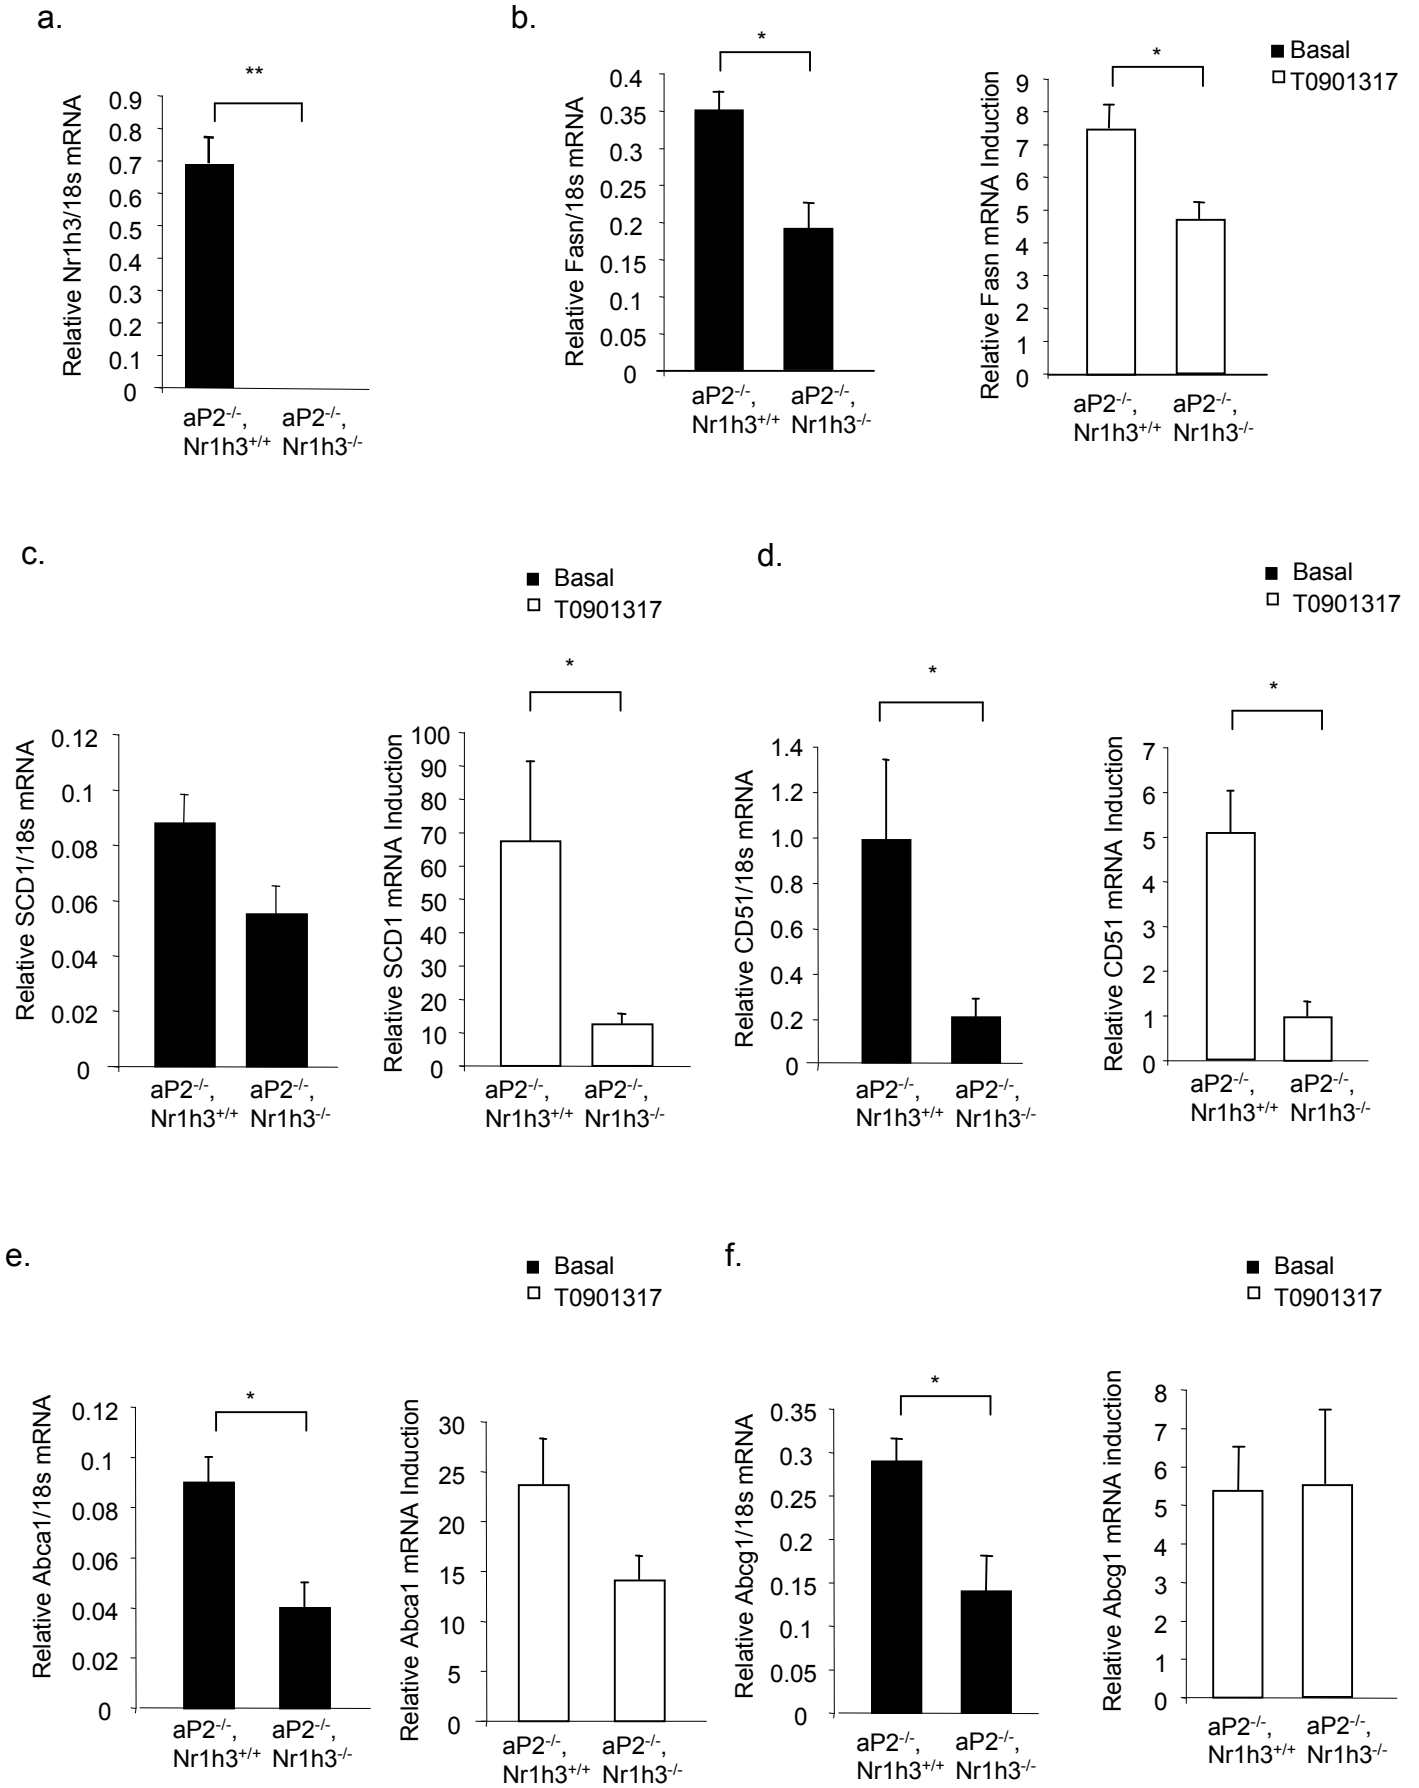

# = Significant in Contrast of "aP2<sup>-/-</sup> vs aP2<sup>-/-</sup>REC"  
 Critical Value = .05

Supp.Table 1

| Metabolites | Mean (SEM)*      |                    |                        |
|-------------|------------------|--------------------|------------------------|
|             | WT               | aP2 <sup>-/-</sup> | aP2 <sup>-/-</sup> REC |
| CE14:0      | 326.95 (13.71)   | 207.12 (34.52)     | 383.72 (46.02)#        |
| CE16:0      | 305.13 (28.25)   | 210.48 (26.66)     | 431.15 (32.92)#        |
| CE18:0      | 227.36 (25.92)   | 81.77 (11.37)      | 240.85 (20.24)#        |
| CE20:0      | 18.72 (2.8)      | 5.71 (0.83)        | 19.4 (1.03)#           |
| CE22:0      | 5.89 (0.55)      | 1.97 (0.24)        | 7.89 (0.65)#           |
| CE24:0      | 24.85 (5.93)     | 5.34 (1.96)        | 15.31 (2.28)           |
| CE16:1n7    | 42.92 (6.65)     | 67.53 (5.84)       | 87.94 (9.76)           |
| CE18:1n7    | 236.47 (29.08)   | 443.73 (25.5)      | 629.56 (70.58)#        |
| CE18:1n9    | 512.23 (75.09)   | 392.41 (46.49)     | 931.1 (122.69)#        |
| CE20:3n9    | 1.47 (0.26)      | 1.21 (0.33)        | 0.4 (0.1)              |
| CE24:1n9    | 26.36 (3.84)     | 18.3 (1.67)        | 33.41 (2.92)#          |
| CE18:2n6    | 20.84 (15.27)    | 11.24 (5.74)       | 21.09 (7.19)           |
| CE18:3n6    | 0.92 (0.3)       | 0.77 (0.43)        | 0.49 (0.23)            |
| CE20:4n6    | 30.57 (6.26)     | 36.73 (8.79)       | 70.13 (8.76)#          |
| CE22:2n6    | 0.9 (0.13)       | 0.72 (0.12)        | 1.22 (0.22)#           |
| CE18:3n3    | 0.54 (0.26)      | 0.63 (0.12)        | 2.87 (0.27)#           |
| CE20:5n3    | 0.91 (0.23)      | 0.89 (0.42)        | 0.98 (0.24)            |
| CE22:5n3    | 8.37 (2)         | 7.38 (2.36)        | 13.23 (1.68)           |
| CE22:6n3    | 1.81 (0.6)       | 2.33 (1.11)        | 5.23 (1.22)#           |
| CETL        | 1921.88 (161.95) | 1536.81 (49.85)    | 3030.81 (320.91)#      |
| CESFA       | 998.42 (131.62)  | 512.4 (67.65)      | 1098.32 (94.38)#       |
| CEMUFA      | 845.15 (115.38)  | 954.17 (36.18)     | 1796.64 (219.94)#      |
| CEPUFA      | 78.31 (23.28)    | 70.24 (18.29)      | 135.85 (10.46)#        |
| CEn3        | 11.63 (2.59)     | 11.23 (3.45)       | 22.31 (1.85)#          |
| CEn6        | 65.21 (20.84)    | 57.8 (15.08)       | 113.14 (9.4)#          |
| CEn7        | 279.39 (35.73)   | 511.26 (29.87)     | 717.5 (80.31)#         |
| CEn9        | 565.16 (79.29)   | 439.65 (54.22)     | 1072.88 (139.48)#      |
| DG14:0      | 24.56 (3.7)      | 54.66 (4.66)       | 87.8 (9.91)#           |
| DG15:0      | 2.72 (0.44)      | 4.24 (0.46)        | 5.01 (0.4)             |
| DG16:0      | 148.51 (17.34)   | 298.62 (28.98)     | 306.4 (11.19)          |
| DG18:0      | 133.62 (9.88)    | 108.35 (10.01)     | 161.97 (9.4)#          |
| DG20:0      | 2.66 (0.35)      | 2.3 (0.1)          | 5.14 (0.5)#            |
| DG22:0      | 1.75 (0.32)      | 2 (0.35)           | 2.63 (0.29)            |
| DG24:0      | 2.71 (0.5)       | 2.08 (0.3)         | 3.15 (0.85)            |
| DG14:1n5    | 0.97 (0.28)      | 1.52 (0.25)        | 1.96 (0.34)            |
| DG16:1n7    | 25.69 (4.04)     | 72.87 (10.04)      | 52.01 (3.73)           |
| DG18:1n7    | 76.21 (6.89)     | 158.66 (21.53)     | 139.28 (13.56)         |
| DG18:1n9    | 237.51 (10.78)   | 303.38 (36.54)     | 477.82 (61.64)#        |
| DG20:1n9    | 7.09 (0.57)      | 6.7 (0.93)         | 17.81 (3.19)#          |
| DG20:3n9    | 5.39 (1.34)      | 1.69 (0.35)        | 1.57 (0.21)            |
| DG22:1n9    | 3.3 (0.53)       | 3.9 (0.57)         | 5.11 (1.27)            |
| DG24:1n9    | 12.97 (2.48)     | 14.87 (6.72)       | 6.1 (1.87)             |

|                 |                |                |                 |
|-----------------|----------------|----------------|-----------------|
| <b>DG18:2n6</b> | 19.64 (2.85)   | 17.53 (1.81)   | 23.23 (3.43)    |
| <b>DG20:2n6</b> | 2.72 (1.24)    | 1.83 (0.38)    | 3.96 (1.15)#    |
| <b>DG20:3n6</b> | 5.45 (0.68)    | 3.41 (0.69)    | 6.37 (0.78)#    |
| <b>DG20:4n6</b> | 30.45 (4.16)   | 27.99 (2.29)   | 34.91 (3.47)    |
| <b>DG22:4n6</b> | 1.58 (0.42)    | 1.58 (0.7)     | 11.13 (3.31)#   |
| <b>DG22:5n6</b> | 1.45 (0.23)    | 1.57 (0.24)    | 2 (0.63)        |
| <b>DG18:3n3</b> | 0.27 (0.23)    | 1.03 (0.37)    | 1.77 (0.63)     |
| <b>DG18:4n3</b> | 0.96 (0.58)    | 1.33 (0.44)    | 1.88 (0.99)     |
| <b>DG20:4n3</b> | 0.13 (0.06)    | 0.53 (0.22)    | 0.43 (0.1)      |
| <b>DG20:5n3</b> | 2.03 (0.9)     | 2.72 (1.58)    | 2.86 (0.68)     |
| <b>DG22:5n3</b> | 3.73 (0.3)     | 4.37 (0.78)    | 6.34 (1.66)     |
| <b>DG22:6n3</b> | 3.85 (0.4)     | 6.64 (1.33)    | 8.51 (1.44)     |
| <b>DGTL</b>     | 383.53 (18.15) | 551.99 (54.41) | 697.3 (50.97)   |
| <b>DGSFA</b>    | 317.76 (27.43) | 472.24 (37.5)  | 572.1 (17.4)    |
| <b>DGMUFA</b>   | 363.74 (20.6)  | 561.9 (67)     | 718.28 (87.33)# |
| <b>DGPUFA</b>   | 85.56 (10.89)  | 69.83 (8.09)   | 104.23 (7.76)#  |
| <b>DGn3</b>     | 14.86 (5.56)   | 14.57 (2.7)    | 22.52 (2.79)    |
| <b>DGn6</b>     | 66.66 (7.55)   | 53.57 (5.97)   | 80.45 (8.58)#   |
| <b>DGn7</b>     | 101.89 (10.92) | 231.53 (31.54) | 191.28 (17.18)  |
| <b>DGn9</b>     | 264.92 (12.65) | 330.54 (36.7)  | 471.92 (61.17)# |

|                 |                 |                  |                 |
|-----------------|-----------------|------------------|-----------------|
| <b>FA14:0</b>   | 37.75 (5.89)    | 65.37 (11.55)    | 69.3 (11.46)    |
| <b>FA15:0</b>   | 4.96 (0.79)     | 6.94 (1.04)      | 9.05 (2.06)     |
| <b>FA16:0</b>   | 161.37 (33.2)   | 328.59 (75.34)   | 366 (51.52)     |
| <b>FA18:0</b>   | 137.39 (25.5)   | 191.8 (54.71)    | 244.35 (43.52)  |
| <b>FA20:0</b>   | 4.11 (0.61)     | 3 (0.54)         | 5.77 (0.68)     |
| <b>FA22:0</b>   | 4.3 (0.47)      | 3.79 (0.82)      | 4.65 (0.53)     |
| <b>FA24:0</b>   | 7.04 (1.48)     | 6.64 (1.45)      | 7.17 (0.93)     |
| <b>FA14:1n5</b> | 2.58 (0.34)     | 3.97 (0.46)      | 3.96 (0.34)     |
| <b>FA16:1n7</b> | 13.34 (2.16)    | 77.24 (26.57)    | 53.9 (12.62)    |
| <b>FA18:1n7</b> | 48.65 (9)       | 211.17 (57.9)    | 250.12 (64.73)  |
| <b>FA18:1n9</b> | 133.71 (24.61)  | 347.31 (100.15)  | 370.39 (75.22)  |
| <b>FA20:1n9</b> | 3.02 (0.42)     | 7.69 (1.62)      | 16.91 (5.08)#   |
| <b>FA20:3n9</b> | 1.4 (0.34)      | 2.27 (0.93)      | 1.18 (0.26)     |
| <b>FA22:1n9</b> | 3.13 (0.75)     | 3.3 (0.76)       | 5.95 (1.08)#    |
| <b>FA24:1n9</b> | 12.37 (0.95)    | 14.92 (2.26)     | 14.53 (1.91)    |
| <b>FA18:2n6</b> | 8.77 (1.48)     | 16.02 (6.25)     | 15.62 (2.52)    |
| <b>FA20:2n6</b> | 0.73 (0.2)      | 1.66 (0.46)      | 4.12 (1.4)      |
| <b>FA20:3n6</b> | 0.81 (0.13)     | 4.28 (2.63)      | 2.81 (0.73)     |
| <b>FA20:4n6</b> | 19.22 (4.37)    | 43.78 (20.18)    | 31.57 (4.75)    |
| <b>FA22:2n6</b> | 0.55 (0.17)     | 0.43 (0.21)      | 0.64 (0.07)     |
| <b>FA22:4n6</b> | 2.02 (0.14)     | 2.89 (0.72)      | 3.59 (0.69)     |
| <b>FA22:5n6</b> | 0.35 (0.07)     | 1.61 (0.9)       | 0.97 (0.27)     |
| <b>FA18:3n3</b> | 0.6 (0.21)      | 1.08 (0.31)      | 1.07 (0.21)     |
| <b>FA18:4n3</b> | 0.19 (0.02)     | 0.8 (0.33)       | 0.94 (0.37)     |
| <b>FA20:5n3</b> | 0.87 (0.29)     | 1.8 (0.72)       | 1.74 (0.25)     |
| <b>FA22:5n3</b> | 2.07 (0.44)     | 7.39 (3.43)      | 4.43 (1.28)     |
| <b>FA22:6n3</b> | 2.17 (0.44)     | 10.2 (4.62)      | 6.84 (1.64)     |
| <b>FATL</b>     | 614.83 (111.01) | 1376.83 (375.04) | 1634.6 (328.22) |

|               |                |                 |                 |
|---------------|----------------|-----------------|-----------------|
| <b>FASFA</b>  | 356.93 (66.3)  | 606.13 (143.45) | 712.26 (110.85) |
| <b>FAMUFA</b> | 216.79 (37.13) | 665.59 (188.21) | 839.47 (218.04) |
| <b>FAPUFA</b> | 41.11 (7.99)   | 105.11 (45.38)  | 82.87 (16.08)   |
| <b>FAn3</b>   | 5.85 (1.37)    | 21.4 (8.68)     | 14.75 (3.41)    |
| <b>FAn6</b>   | 33.86 (7.08)   | 81.44 (35.98)   | 67.17 (13.72)   |
| <b>FAn7</b>   | 61.99 (10.88)  | 288.41 (84.33)  | 304.02 (77.23)  |
| <b>FAn9</b>   | 153.62 (26.33) | 375.49 (104.54) | 532.43 (140.94) |

|                   |                   |                    |                     |
|-------------------|-------------------|--------------------|---------------------|
| <b>PL14:0</b>     | 1032.18 (33.09)   | 1766.39 (46.91)    | 1066.87 (55.73)#    |
| <b>PL15:0</b>     | 83.41 (2.37)      | 131.16 (4.1)       | 95.79 (3.62)#       |
| <b>PL16:0</b>     | 5528.26 (184.12)  | 11913.91 (1045.58) | 7721.08 (245.4)#    |
| <b>PL18:0</b>     | 8792.84 (197.39)  | 8209.33 (693.81)   | 7680.21 (547.42)    |
| <b>PL20:0</b>     | 66.27 (4.07)      | 40.94 (4.27)       | 88.93 (8.23)#       |
| <b>PL22:0</b>     | 227.88 (26.85)    | 200.6 (40.46)      | 217.08 (30.32)      |
| <b>PL24:0</b>     | 347.27 (47.24)    | 294.2 (55.67)      | 357.54 (66.04)      |
| <b>PL14:1n5</b>   | 23.56 (0.85)      | 31.81 (5.35)       | 34.94 (1.16)        |
| <b>PL16:1n7</b>   | 1672.49 (44.46)   | 4525.46 (556.48)   | 2119.86 (99.82)#    |
| <b>PL18:1n7</b>   | 3842.25 (132.16)  | 9323.17 (947.16)   | 5110.12 (288.6)#    |
| <b>PL18:1n9</b>   | 14179.03 (370.24) | 19249.84 (1424)    | 15889.77 (1422.48)# |
| <b>PL20:1n9</b>   | 392.66 (9.64)     | 314.09 (36.49)     | 367.59 (35.58)      |
| <b>PL20:3n9</b>   | 371.58 (9.22)     | 208.56 (62.54)     | 112.84 (8.31)       |
| <b>PL22:1n9</b>   | 32.44 (1.42)      | 25.57 (2.9)        | 27.35 (1.75)        |
| <b>PL24:1n9</b>   | 489.4 (66.57)     | 592.25 (77.06)     | 594.97 (71.92)      |
| <b>PL18:2n6</b>   | 1441.06 (25.77)   | 1647.94 (116.13)   | 1437.71 (89.99)     |
| <b>PL18:3n6</b>   | 14.6 (1.38)       | 17 (1.55)          | 13.04 (1.55)        |
| <b>PL20:2n6</b>   | 95.82 (8.28)      | 119.01 (14.11)     | 102.7 (4.38)        |
| <b>PL20:3n6</b>   | 499.81 (10.6)     | 463.16 (28.69)     | 490.29 (29.01)      |
| <b>PL20:4n6</b>   | 2740.78 (89.39)   | 3276.45 (270.61)   | 2608.55 (128.52)#   |
| <b>PL22:4n6</b>   | 337.18 (12.21)    | 355.91 (22.22)     | 340 (17.78)         |
| <b>PL22:5n6</b>   | 128.78 (4.01)     | 152.11 (8.13)      | 128.8 (6.38)#       |
| <b>PL18:3n3</b>   | 6.09 (0.3)        | 14.09 (1.35)       | 13.14 (1)           |
| <b>PL20:4n3</b>   | 4.84 (0.71)       | 4.11 (1.19)        | 4.35 (1.03)         |
| <b>PL20:5n3</b>   | 121.96 (5.18)     | 130.52 (25.48)     | 88.13 (6.06)        |
| <b>PL22:5n3</b>   | 445.83 (16.57)    | 630.11 (82.97)     | 431.43 (22.35)#     |
| <b>PL22:6n3</b>   | 600.76 (21.66)    | 811.39 (103.93)    | 579.14 (27.99)#     |
| <b>PLdm16:0</b>   | 1369.76 (115.4)   | 1787.11 (284.67)   | 1392.81 (230.34)    |
| <b>PLdm18:0</b>   | 1024.32 (20.19)   | 449.81 (68.74)     | 627.1 (97.86)       |
| <b>PLdm18:1n7</b> | 764.39 (31.5)     | 976.09 (115.53)    | 556.6 (72.79)#      |
| <b>PLdm18:1n9</b> | 446.96 (22.86)    | 317.06 (33.68)     | 255.11 (30.8)       |
| <b>PLTL</b>       | 23565.02 (525.38) | 32729.5 (3001.27)  | 25336.96 (1564.48)# |
| <b>PLSFA</b>      | 16078.11 (393.35) | 22572.33 (1745.03) | 17227.5 (775.81)#   |
| <b>PLMUFA</b>     | 20636.4 (498.37)  | 31520.47 (3422.48) | 24144.61 (1792.56)# |
| <b>PLPUFA</b>     | 6810.09 (192.27)  | 7836.15 (635.65)   | 6470.21 (309.71)#   |
| <b>PLn3</b>       | 1180.48 (42.96)   | 1595.52 (214.75)   | 1120.68 (52.07)#    |
| <b>PLn6</b>       | 5258.03 (140.68)  | 6032.06 (452.82)   | 5236.68 (254.69)#   |
| <b>PLn7</b>       | 5514.74 (153.65)  | 15156.87 (1769.62) | 7229.98 (366.97)#   |
| <b>PLn9</b>       | 15469.69 (422.1)  | 20378.08 (1428.26) | 16992.53 (1429.84)# |
| <b>PLdm</b>       | 3605.43 (153.98)  | 3530.07 (455.58)   | 2831.61 (405.12)    |



|                 |                  |                   |                   |
|-----------------|------------------|-------------------|-------------------|
| <b>TG14:0</b>   | 586.09 (32.53)   | 1057.83 (266.62)  | 827.9 (148.87)    |
| <b>TG15:0</b>   | 30.44 (0.85)     | 40.62 (7.04)      | 39.96 (6.51)      |
| <b>TG16:0</b>   | 2152.47 (67.98)  | 3972.27 (906.51)  | 3449.14 (529.19)  |
| <b>TG18:0</b>   | 1594.01 (39.94)  | 1172.71 (238.29)  | 1769.31 (283.31)  |
| <b>TG20:0</b>   | 49.63 (3.35)     | 41.65 (4.47)      | 77.25 (7.18)#     |
| <b>TG22:0</b>   | 8.39 (0.42)      | 6.73 (0.88)       | 17.71 (0.9)#      |
| <b>TG24:0</b>   | 11.64 (0.39)     | 9.95 (1.3)        | 22.11 (0.8)#      |
| <b>TG14:1n5</b> | 7.94 (0.63)      | 28.01 (6.44)      | 16.55 (1.85)#     |
| <b>TG16:1n7</b> | 228.3 (13.45)    | 690.93 (166.14)   | 337.02 (41.15)#   |
| <b>TG18:1n7</b> | 1196.11 (44.89)  | 2465.73 (560.49)  | 1523.57 (234.97)# |
| <b>TG18:1n9</b> | 3271.27 (131.33) | 3652.67 (701.61)  | 3676.08 (633.79)  |
| <b>TG20:1n9</b> | 151.64 (3.84)    | 114.44 (15.26)    | 191.14 (32.37)#   |
| <b>TG20:3n9</b> | 16.47 (1.5)      | 7.11 (1.14)       | 6.01 (0.81)       |
| <b>TG22:1n9</b> | 18.28 (0.96)     | 18.27 (1.75)      | 34.29 (4.7)#      |
| <b>TG24:1n9</b> | 10.23 (0.61)     | 10.53 (1.22)      | 27.51 (2.33)#     |
| <b>TG18:2n6</b> | 102.41 (3.61)    | 85.03 (14.89)     | 88.16 (11.28)     |
| <b>TG18:3n6</b> | 1.15 (0.27)      | 1.39 (0.37)       | 2.71 (0.87)       |
| <b>TG20:2n6</b> | 11.05 (0.76)     | 13.58 (3.28)      | 24.62 (8.97)      |
| <b>TG20:3n6</b> | 28.55 (1.64)     | 16.23 (2.01)      | 23.75 (3.54)#     |
| <b>TG20:4n6</b> | 148.42 (13.85)   | 143.1 (17.62)     | 145.1 (27.96)     |
| <b>TG22:2n6</b> | 0.99 (0.23)      | 1.31 (0.22)       | 3.02 (0.79)#      |
| <b>TG22:4n6</b> | 20.33 (1.75)     | 18.64 (3.29)      | 19.73 (3.8)       |
| <b>TG22:5n6</b> | 3.86 (0.26)      | 4.45 (1.14)       | 4.4 (0.46)        |
| <b>TG18:3n3</b> | 2.43 (0.37)      | 4.77 (0.48)       | 4.73 (0.88)       |
| <b>TG18:4n3</b> | 5.63 (1.34)      | 8.37 (2.59)       | 8.86 (1.62)       |
| <b>TG20:4n3</b> | 0.41 (0.12)      | 0.72 (0.2)        | 0.42 (0.16)       |
| <b>TG20:5n3</b> | 3.34 (0.48)      | 4.11 (1.42)       | 2.83 (0.41)       |
| <b>TG22:5n3</b> | 28.23 (1.85)     | 32.46 (4.4)       | 25.67 (5.08)      |
| <b>TG22:6n3</b> | 17.08 (1.19)     | 31.16 (4.6)       | 19.33 (3.06)#     |
| <b>TGTL</b>     | 3235.59 (81.19)  | 4550.95 (970.62)  | 4129.44 (656.95)  |
| <b>TGSFA</b>    | 4432.67 (131.62) | 6301.76 (1414.95) | 6203.38 (973.85)  |
| <b>TGMUFA</b>   | 4883.76 (194.16) | 6980.58 (1451.49) | 5806.16 (950.15)  |
| <b>TGPUFA</b>   | 390.34 (24.77)   | 370.52 (49.35)    | 378.79 (53.6)     |
| <b>TGn3</b>     | 57.11 (3.51)     | 80.48 (11.87)     | 61.84 (10.4)      |
| <b>TGn6</b>     | 316.76 (20.38)   | 282.93 (38.83)    | 310.95 (42.66)    |
| <b>TGn7</b>     | 1424.41 (58.06)  | 3156.66 (726.12)  | 1860.59 (275.71)# |
| <b>TGn9</b>     | 3467.88 (137.33) | 3803.02 (718.91)  | 3935.03 (673.41)  |

## Supplemental Figure Legends:

**S.Fig.1: Macrophage apoptosis and systemic response to PBA treatment in lipotoxic conditions** (a) ER stress was induced in wild-type, bone marrow derived, mouse macrophage lines by 500  $\mu$ M PA with or without the presence of 3  $\mu$ M PBA where indicated. Apoptosis was measured by performing TUNEL assays. (b) Total lesion area was determined from enface aorta preparations of control mice treated with PBS or 100 mg  $\text{kg}^{-1}$  PBA ( $n \geq 13$ ). (c-f) Serum triglyceride (c), cholesterol (d), plasma glucose (e) and insulin (f) were determined from control and 100 mg  $\text{kg}^{-1}$  PBA treated mice at the time of sacrifice ( $n \geq 13$ ). (g) Double immunofluorescent staining was performed in the same section from lesions of *ApoE*<sup>-/-</sup> mice treated with PBA (100 mg  $\text{kg}^{-1}$ ) or vehicle using antibodies against MOMA-2 and ATF3 or MOMA-2 and P-eIF2- $\alpha$  (Arrows indicate ER stress marker expression, ATF3 or P-eIF2- $\alpha$ , in macrophage-rich areas of the lesions.).

**S.Fig.2: Fatty acid induced stress response** (a) Relative *aP2* mRNA was measured by qRT-PCR in macrophage lines treated with PA (500  $\mu$ M) with or without the presence of PBA (3 mM). (b-d) ER stress was assessed in bone marrow derived macrophages upon 500  $\mu$ M PA or ST treatment. PERK phosphorylation (a), *Ddit3* (b) and *sXBP-1* induction (c) in bone marrow-derived macrophages can be prevented by simultaneous addition of palmitoleate (PA) or oleate (OAE) (500  $\mu$ M). (e) <sup>14</sup>C labeled PA uptake was determined in various bone marrow-derived macrophage lines. (f) Relative *Ddit3* mRNA was determined by qRT-PCR from bone marrow-derived macrophage lines treated with PA (500  $\mu$ M) or tunicamycin (2 mg  $\text{mL}^{-1}$ ) for 12 hours. (g) The apoptotic indicator, caspase 3/7 activity, was examined in the various bone marrow derived macrophage lines after treatment with vehicle or PA (500  $\mu$ M) and reported as relative luciferase units (RLU). (h) Apoptosis was assessed in bone marrow

derived macrophage lines in the absence or presence of AcLDL and ACAT inhibitor by detecting active caspase 3 and cleaved PARP by Western blotting.

**S.Fig.3: Macrophage apoptosis in lesions and aP2i effect on fatty acid uptake** (a) TUNEL assay and immunofluorescent staining was performed in the same section from atherosclerotic lesion of *ApoE*<sup>-/-</sup> mice. Arrows point to TUNEL positive cells (green) in MOMA-2 staining macrophages (red). (b) C<sup>14</sup> labeled palmitic acid uptake was determined in insulin and vehicle or aP2-i treated bone marrow-derived macrophage lines.

**S.Fig.4: Endogenous gene expression in aP2<sup>-/-</sup> and WT macrophages** (a) *Abcg1* (b), *Abca1* (c), *CD51*, (d) *Nr1h3* and (e) *Nr1h2*, mRNA levels were determined from *aP2*<sup>-/-</sup> and WT macrophages by qRT-PCR. Student's t-test was performed to statistically analyze the quantitative data and all data shown represent mean±; SEM; \* indicates p<0.05 and \*\* indicates p<0.01.

**S.Fig.5: LXR $\alpha$  activity protects against PA-induced macrophage ER stress:** (a) 100nM of *Nr1h3* siRNA suppressed LXR- $\alpha$  expression more than 80% in bone marrow derived WT macrophage line as determined by qRT-PCR. The LXR-regulated genes, (b) *Abca1*, (c) *Abcg1*, (d) *CD51* and (e) *SCD-1*, were reduced to varying degrees in the *Nr1h3* siRNA treated *aP2*<sup>-/-</sup> or WT macrophages in the presence or absence of an LXR agonist T0901317 (10  $\mu$ M) treatment for 24 hours. (f) Pretreatment of macrophages with T0901317 (10  $\mu$ M) prevents PA-induced *XBP-1* mRNA splicing in WT macrophage line (data represent mean±; SEM; \* indicates p<0.05 and \*\* indicates p<0.01).

**S.Fig.6: Endogenous gene expression in aP2<sup>-/-</sup> and aP2<sup>-/-</sup>Nr1h3<sup>-/-</sup> primary peritoneal macrophages** (a) *Nr1h3*, (b) *Fasn*, (c) *SCD-1* (d) *CD51*, (e) *Abca1* and (f) *Abcg1* mRNA levels were determined by qRT-PCR from *aP2*<sup>-/-</sup> and *aP2*<sup>-/-</sup>

*Nr1h3*<sup>-/-</sup> macrophages treated with vehicle (basal) or T0901317 (10 μM) for 24 hours (data represent mean±; SEM; \* indicates p<0.05 and \*\* indicates p<0.01).

**S.Table-1: Distribution of fatty acids in various lipid species.** Quantitative measurement of various fatty acids was determined for WT, *aP2*<sup>-/-</sup>, *aP2*<sup>-/-</sup>-REC macrophages. (CE: cholesterol ester, DG: diacylglycerol, FA: fatty acid, PL: phospholipid, TL: total lipids FAS: Fattyacid synthase, MUFA: monounsaturated fatty acids, PUFA: polyunsaturated fatty acids). Statistical analysis: In order to evaluate the effects of genotype, a one-way ANOVA was used. All data represent mean±; SEM; \* indicates p<0.05, n=5.
